# Supplementary material for: Prediction and prioritization of autism-associated long non-coding RNAs using gene expression and sequence features
Source: PubMed Central journal article supplement (PMC7648398; doi:10.1186/s12859-020-03843-5), 2020-11-07
Supplement: 12859_2020_3843_MOESM1_ESM.pdf [file 12859_2020_3843_MOESM1_ESM.pdf]

Supplementary Figures and Tables for

**Prediction and prioritization of autism-associated long non-coding RNAs using gene expression and sequence features**

Jun Wang<sup>1</sup> and Liangjiang Wang<sup>1,2,\*</sup>

<sup>1</sup>Department of Genetics and Biochemistry, <sup>2</sup>Center for Human Genetics, Clemson University, Clemson, South Carolina, 29634, USA.

\*To whom correspondence should be addressed. Tel: (+1) 864-656-0733; Fax: (+1) 864-656-0393; Email: liangjw@clemson.edu

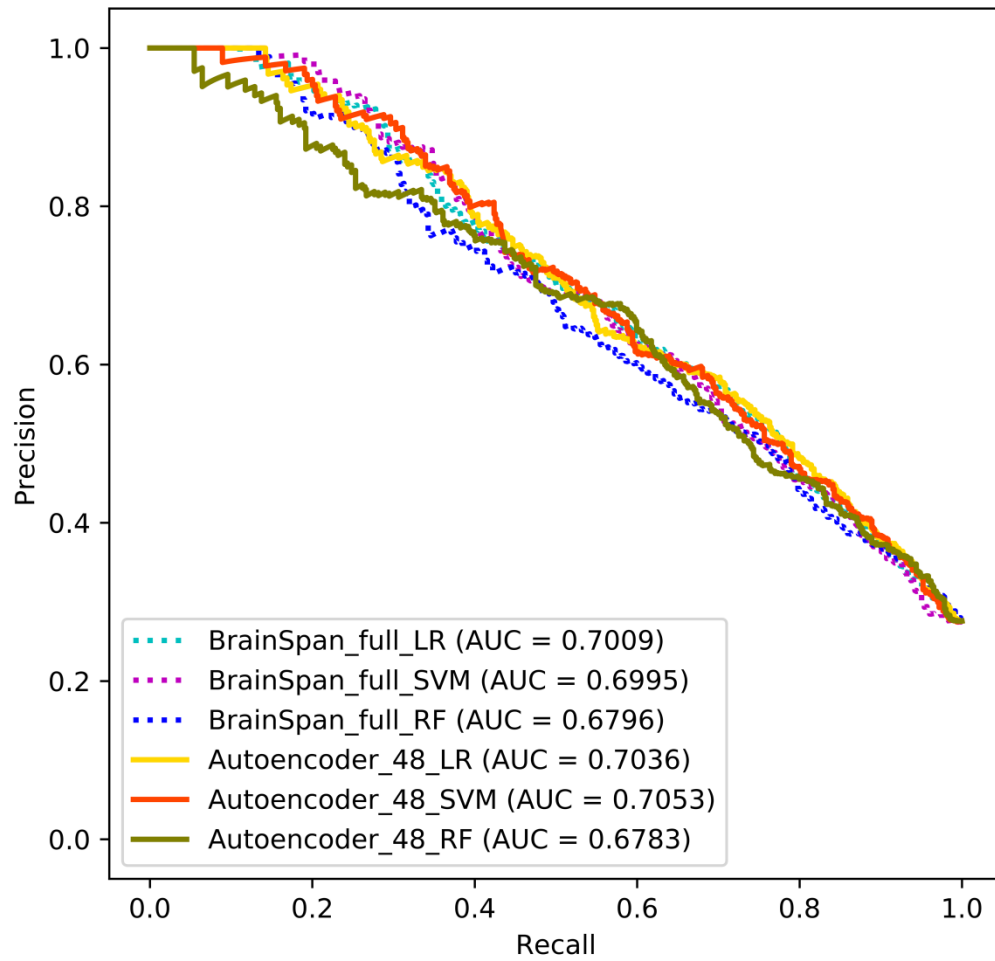

**Fig. S1.** PR curves to compare the models trained with the full set of 524 expression features and the 48 autoencoder-derived features.

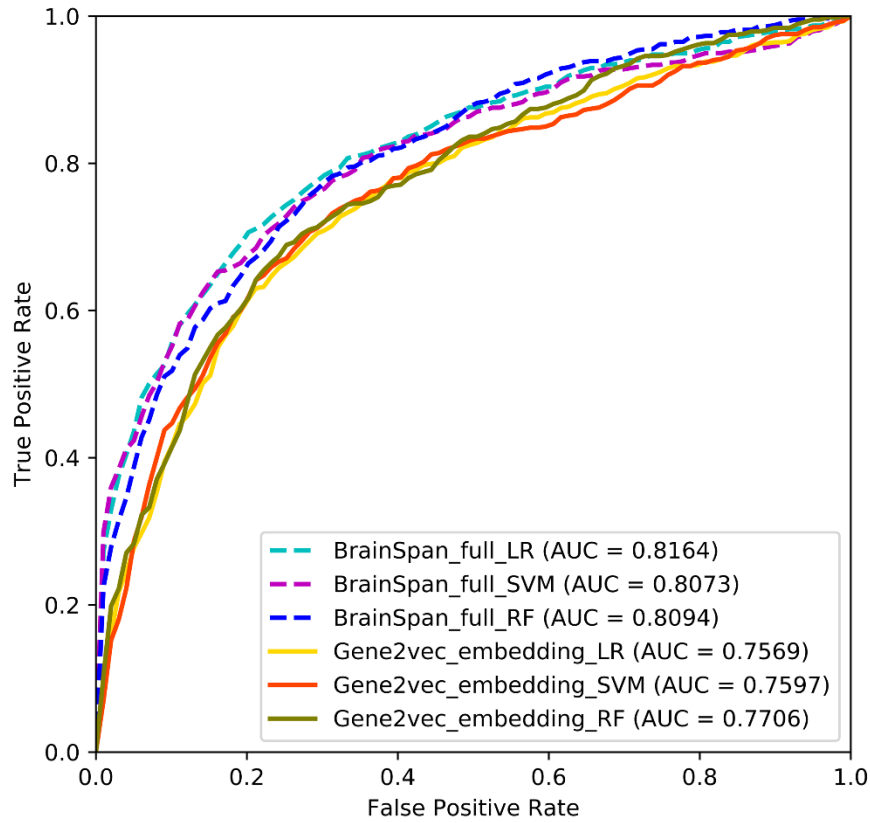

**Fig. S2.** ROC curves to compare the models trained with the full set of 524 expression features and the Gene2vec-embedded features. According to the ROC AUC of the three models using tenfold cross-validations,  $PCC > 0.5$  was used to select co-expressed gene pairs in the BrainSpan dataset, and the dimension of 300 at iteration 4 was found to produce gene embedding with the best performance of LR, SVM and RF models.

# LR

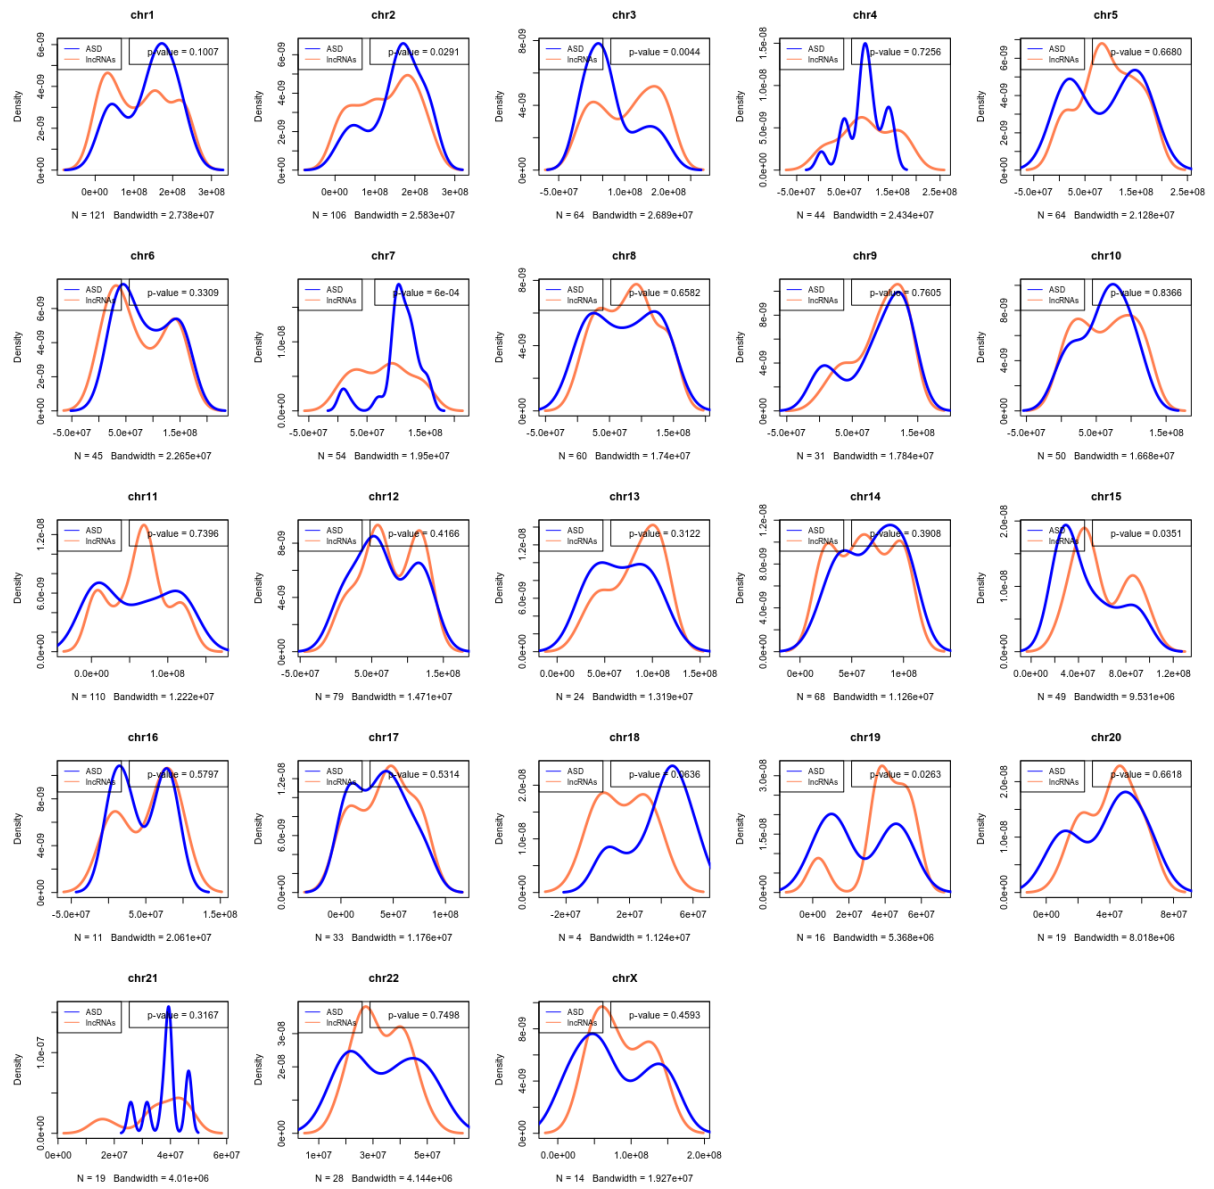

## SVM

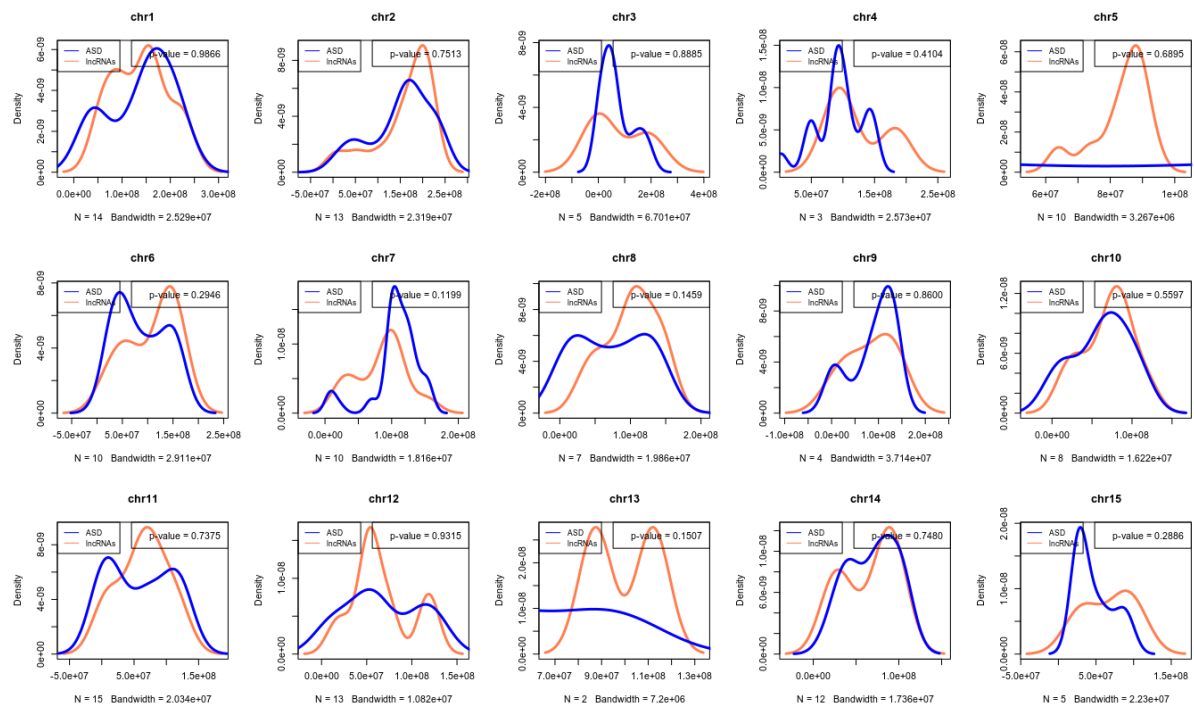

## RF

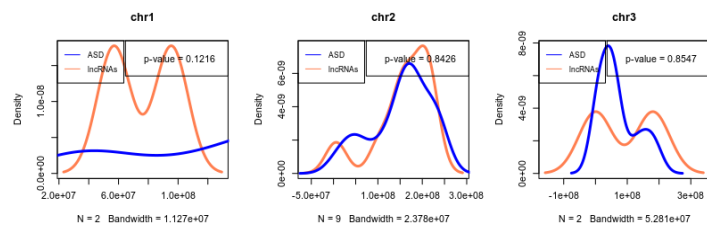

**Fig. S3.** Genomic distributions of ASD-associated candidate lncRNAs and the known ASD risk genes. Density plot based on the gene starting site was performed. Two-sample Kolmogorov-Smirnov (KS) test was used to examine the statistical significance of similarity between distributions. The  $p$ -value ranges from 0 to 1, with 0 for no similarity between the genomic distributions of candidate lncRNAs and ASD risk genes, and 1 for the same distributions.

**Table S1. Performance of models using the Gene2vec-embedded features\*.**

| PCC | Model | Dimension | Number of Iterations |      |      |      |      |      |      |      |      |      |      |
|-----|-------|-----------|----------------------|------|------|------|------|------|------|------|------|------|------|
|     |       |           | 1                    | 2    | 3    | 4    | 5    | 6    | 7    | 8    | 9    | 10   |      |
| 0.5 | LR    | 50        | 0.74                 | 0.75 | 0.76 | 0.76 | 0.76 | 0.76 | 0.76 | 0.76 | 0.76 | 0.76 | 0.76 |
|     |       | 100       | 0.74                 | 0.76 | 0.76 | 0.76 | 0.76 | 0.76 | 0.76 | 0.76 | 0.76 | 0.76 | 0.76 |
|     |       | 200       | 0.74                 | 0.76 | 0.76 | 0.76 | 0.75 | 0.76 | 0.75 | 0.75 | 0.75 | 0.75 | 0.75 |
|     |       | 300       | 0.74                 | 0.76 | 0.76 | 0.76 | 0.76 | 0.76 | 0.76 | 0.76 | 0.75 | 0.75 | 0.75 |
|     | SVM   | 50        | 0.75                 | 0.75 | 0.76 | 0.76 | 0.76 | 0.76 | 0.77 | 0.77 | 0.76 | 0.77 | 0.77 |
|     |       | 100       | 0.75                 | 0.76 | 0.76 | 0.77 | 0.77 | 0.76 | 0.76 | 0.76 | 0.76 | 0.76 | 0.77 |
|     |       | 200       | 0.76                 | 0.73 | 0.73 | 0.76 | 0.75 | 0.76 | 0.76 | 0.77 | 0.76 | 0.76 | 0.75 |
|     |       | 300       | 0.76                 | 0.75 | 0.75 | 0.76 | 0.76 | 0.78 | 0.76 | 0.76 | 0.76 | 0.76 | 0.76 |
|     | RF    | 50        | 0.76                 | 0.78 | 0.77 | 0.78 | 0.77 | 0.77 | 0.78 | 0.77 | 0.79 | 0.77 | 0.77 |
|     |       | 100       | 0.77                 | 0.77 | 0.80 | 0.78 | 0.78 | 0.80 | 0.78 | 0.80 | 0.80 | 0.80 | 0.80 |
|     |       | 200       | 0.77                 | 0.79 | 0.78 | 0.78 | 0.78 | 0.80 | 0.78 | 0.78 | 0.78 | 0.78 | 0.78 |
|     |       | 300       | 0.76                 | 0.77 | 0.77 | 0.80 | 0.78 | 0.77 | 0.78 | 0.79 | 0.80 | 0.78 | 0.78 |
| 0.9 | LR    | 50        | 0.51                 | 0.51 | 0.51 | 0.53 | 0.55 | 0.55 | 0.56 | 0.57 | 0.57 | 0.58 |      |
|     |       | 100       | 0.51                 | 0.53 | 0.53 | 0.53 | 0.56 | 0.56 | 0.56 | 0.56 | 0.56 | 0.56 |      |
|     |       | 200       | 0.51                 | 0.52 | 0.53 | 0.57 | 0.59 | 0.60 | 0.60 | 0.60 | 0.60 | 0.59 |      |
|     |       | 300       | 0.54                 | 0.54 | 0.55 | 0.56 | 0.56 | 0.56 | 0.57 | 0.58 | 0.58 | 0.58 |      |
|     | SVM   | 50        | 0.57                 | 0.56 | 0.56 | 0.53 | 0.55 | 0.56 | 0.56 | 0.56 | 0.56 | 0.56 |      |
|     |       | 100       | 0.60                 | 0.61 | 0.62 | 0.55 | 0.56 | 0.56 | 0.57 | 0.58 | 0.58 | 0.58 |      |
|     |       | 200       | 0.59                 | 0.60 | 0.60 | 0.56 | 0.59 | 0.58 | 0.59 | 0.59 | 0.58 | 0.58 |      |
|     |       | 300       | 0.62                 | 0.63 | 0.64 | 0.63 | 0.58 | 0.58 | 0.58 | 0.58 | 0.58 | 0.58 |      |
|     | RF    | 50        | 0.59                 | 0.59 | 0.59 | 0.63 | 0.61 | 0.63 | 0.62 | 0.64 | 0.63 | 0.63 |      |
|     |       | 100       | 0.60                 | 0.60 | 0.64 | 0.65 | 0.64 | 0.65 | 0.65 | 0.65 | 0.64 | 0.65 |      |
|     |       | 200       | 0.60                 | 0.61 | 0.64 | 0.64 | 0.64 | 0.67 | 0.65 | 0.66 | 0.66 | 0.67 |      |
|     |       | 300       | 0.62                 | 0.64 | 0.66 | 0.66 | 0.65 | 0.66 | 0.66 | 0.65 | 0.66 | 0.65 |      |

\* The ROC AUC values of the models from tenfold cross-validations are shown. For the Gene2vec model, various hyper-parameters, Pearson Correlation Coefficient (PCC) and number of iterations were tested to generate the best Gene2vec-embedded features to train LR, SVM and RF models.

**Table S2. Frequency comparisons for the 25 *k*-mer features in the positive and negative instances.**

| <i>k</i> -mers | <i>p</i> -value* | Higher frequency in the positive (P) or negative (N) instances |
|----------------|------------------|----------------------------------------------------------------|
| CGTT           | 3.08E-07         | P                                                              |
| TGGG           | 1.69E-19         | N                                                              |
| TGG            | 3.45E-23         | N                                                              |
| CTGG           | 1.81E-25         | N                                                              |
| CGCG           | 0.238453114      | \                                                              |
| CTCA           | 2.08E-08         | N                                                              |
| GTCA           | 0.002501482      | P                                                              |
| CGAC           | 0.696533812      | \                                                              |
| TGAG           | 2.33E-11         | N                                                              |
| CTG            | 2.58E-19         | N                                                              |
| ACCT           | 1.44E-10         | N                                                              |
| TGGC           | 1.51E-16         | N                                                              |
| CCTG           | 8.29E-17         | N                                                              |
| ATCT           | 0.50649693       | \                                                              |
| AAGG           | 0.033015097      | N                                                              |
| CGTA           | 0.000189088      | P                                                              |
| CGTC           | 0.835369262      | \                                                              |
| CCGT           | 0.969627512      | \                                                              |
| TTCG           | 0.027247256      | P                                                              |
| AGCG           | 0.992167296      | \                                                              |
| GGGT           | 2.61E-11         | N                                                              |
| ATCG           | 0.412519657      | \                                                              |
| ACA            | 8.01E-09         | P                                                              |
| GCGT           | 0.01094848       | N                                                              |
| GCGG           | 0.323093951      | \                                                              |

\* The *p*-value was calculated using the Welch two sample t-test.

**Table S3. Training parameters tuned for the best mode performance.**

| <b>Model</b> | <b>Parameter symbol</b> | <b>Parameter description</b>                              | <b>Testing range</b> | <b>Determined parameter</b> |
|--------------|-------------------------|-----------------------------------------------------------|----------------------|-----------------------------|
| LR           | C                       | Inverse of regularization strength                        | 0.1-2                | 1.660055524                 |
|              | n_jobs                  | Number of CPU cores used                                  | 1-5                  | 2                           |
|              | max_iter                | Maximum iteration number for the solvers to converge      | 256                  | 256                         |
|              | solver                  | Algorithm                                                 | 'lbfgs'              | 'lbfgs'                     |
|              | penalty                 | The norm used in the penalization                         | 'l1', 'l2'           | l2                          |
| SVM          | kernel                  | Kernel type to be used                                    | 'rbf'                | 'rbf'                       |
|              | C                       | Penalty parameter of the error                            | 2-526                | 517.881968350               |
|              | gamma                   | Kernel coefficient                                        | 0.001-0.1            | 0.069482974                 |
| RF           | n_estimators            | Number of trees                                           | 32-500               | 128                         |
|              | criterion               | Function to control split quality                         | 'gini', 'entropy'    | 'gini'                      |
|              | max_depth               | Maximum depth of the tree                                 | 5-12                 | 5                           |
|              | min_samples_split       | Minimum number of samples to split an internal node       | 2-8                  | 4                           |
|              | max_features            | Function to determine the feature numbers for best splits | 'log2', 'sqrt'       | 'log2'                      |
