# Supplementary material for: Prediction and prioritization of autism-associated long non-coding RNAs using gene expression and sequence features
Source: BMC Bioinformatics. 2020 Nov 7;21:505. doi: 10.1186/s12859-020-03843-5 (PMC7648398; doi:10.1186/s12859-020-03843-5)
Supplement: Supplementary file 2 — Additional file 2. The average importance score calculated by the random forest model for each of the 320 k-mer features. [file 12859_2020_3843_MOESM2_ESM.csv]

kmers	1	2	3	4	5	6	7	8	9	10	mean
CGTT	0.017189986	0.009622272	0.013714559	0.012220672	0.009814144	0.008795124	0.010588276	0.021976958	0.010355608	0.01722373	0.013150133
TGGG	0.015185001	0.009763732	0.008652435	0.010332304	0.008863743	0.010479949	0.011439958	0.013272649	0.007344547	0.018896832	0.011423115
TGG	0.015418623	0.010403066	0.009804955	0.010918364	0.009320161	0.010598171	0.012018548	0.015488447	0.009250252	0.007846311	0.01110669
CTGG	0.012018951	0.010012632	0.007783476	0.009627506	0.009340706	0.012590537	0.008227204	0.014188304	0.007522598	0.015427963	0.010673988
CGCG	0.011105107	0.010125828	0.010724279	0.009967223	0.008745616	0.010219419	0.010621062	0.013313345	0.008110887	0.013304291	0.010623706
CTCA	0.012556887	0.008373666	0.008642112	0.007684754	0.00739963	0.006646949	0.007828641	0.004844467	0.008776802	0.008656446	0.008141035
GTCA	0.008623532	0.006519801	0.007438588	0.007667748	0.00630345	0.006266239	0.007885988	0.010479658	0.006654645	0.010894246	0.007873389
CGAC	0.008893077	0.006645407	0.010345421	0.006945425	0.006438877	0.007119823	0.005908818	0.007429577	0.006291429	0.009951499	0.007596935
TGAG	0.008335536	0.007755934	0.005086423	0.007935756	0.007023038	0.009156002	0.006991584	0.00867684	0.005778542	0.008833258	0.007557291
CTG	0.008269734	0.008804908	0.002634291	0.005748559	0.005317311	0.008104393	0.007572114	0.007823999	0.00493461	0.009999197	0.006920912
ACCT	0.007015575	0.006489931	0.006787434	0.005933362	0.006187697	0.004738552	0.006307747	0.006781498	0.006158111	0.00785497	0.006425488
TGGC	0.005932617	0.007416818	0.005420925	0.006241952	0.00585511	0.006550866	0.005819592	0.006130368	0.005966283	0.005403593	0.006073812
CCTG	0.00628761	0.005961498	0.003269789	0.007072291	0.005486447	0.006377677	0.004866841	0.006850153	0.005566318	0.0051008	0.005683942
ATCT	0.00629874	0.005581098	0.004816598	0.005958472	0.005258832	0.005638919	0.006564493	0.006267606	0.005097943	0.004755421	0.005623812
AAGG	0.006869166	0.00480489	0.007463186	0.004608612	0.006584831	0.005801834	0.00420677	0.00464608	0.006551174	0.00463598	0.005617252
CGTA	0.005673017	0.005449066	0.00589122	0.005460705	0.004010412	0.00570992	0.005514148	0.005699858	0.004568322	0.007808831	0.00557855
CGTC	0.007437146	0.005278247	0.002682453	0.00668333	0.005155795	0.005947943	0.005669735	0.006332979	0.00567781	0.004783079	0.005564852
CCGT	0.005754161	0.005364872	0.004363842	0.005505901	0.004982046	0.005418158	0.004882975	0.007878029	0.005211523	0.004677629	0.005403914
TTCG	0.00689334	0.0052323	0.004252809	0.005180396	0.005340109	0.005513391	0.005433821	0.005651894	0.005756883	0.003355557	0.00526105
AGCG	0.006083032	0.005101929	0.006770681	0.005117647	0.004579412	0.00479942	0.00485504	0.004143476	0.004765304	0.005731947	0.005194789
GGGT	0.004913077	0.00480609	0.00452971	0.004868159	0.00495824	0.00640465	0.006096975	0.004159972	0.005136307	0.006042256	0.005191544
ATCG	0.005621959	0.005041878	0.002844789	0.00537526	0.004702935	0.004645979	0.006017249	0.005295171	0.005101211	0.005525745	0.005017218
ACA	0.004716706	0.005446274	0.004600712	0.005868495	0.004631731	0.005414776	0.005875681	0.004958348	0.005223828	0.003431734	0.005016828
GCGT	0.005236107	0.004552693	0.007475578	0.004063631	0.004352414	0.004562413	0.004520356	0.004454636	0.004534902	0.006284017	0.005003675
GCGG	0.004153602	0.004718716	0.00241474	0.005607797	0.004764659	0.005055957	0.00581516	0.005400044	0.003893656	0.007467906	0.004929224
TTTT	0.004863349	0.003484731	0.008363081	0.005281355	0.003280135	0.004477879	0.004869172	0.005109172	0.003234547	0.005758073	0.004872149
CGT	0.00648074	0.004781697	0.003423679	0.004316884	0.005002152	0.004223006	0.005134555	0.005569281	0.004206395	0.005581536	0.004871993
AGGC	0.00649056	0.003722906	0.002923954	0.005238875	0.004745458	0.004851849	0.005221844	0.003793889	0.005423133	0.005432236	0.00478447
GCT	0.003578878	0.004748223	0.007888515	0.004597804	0.003334241	0.005532828	0.004340179	0.003925734	0.003238998	0.006029995	0.00472154
GGAT	0.00501476	0.004685985	0.003039232	0.004970324	0.004807955	0.004694744	0.005173956	0.004899349	0.004755734	0.004171672	0.004621371
GGT	0.004473706	0.004494038	0.005929381	0.00477517	0.004050865	0.003273967	0.005452338	0.004436894	0.004199347	0.004725854	0.004581156
AGCA	0.004812123	0.00496884	0.004972961	0.005181761	0.004018581	0.003949368	0.005432188	0.004083116	0.004043697	0.003732733	0.004519537
TATA	0.004462379	0.004119103	0.003912211	0.003690799	0.003903016	0.003844976	0.004607835	0.007710024	0.003270623	0.005203258	0.004472422
ACGT	0.004289529	0.004516188	0.00497376	0.004381741	0.003625382	0.004528468	0.004671574	0.005384142	0.004059167	0.00365808	0.004408803
CACA	0.004096862	0.004322126	0.00394642	0.004565406	0.003479032	0.004364689	0.003952778	0.005637952	0.003713969	0.005385979	0.004346521
GCGA	0.004232125	0.005087187	0.004185863	0.003511405	0.004814008	0.00520025	0.004565275	0.003222087	0.0044167	0.003952734	0.004318763
GCGC	0.004396184	0.003439644	0.00658515	0.003572368	0.00376709	0.003690336	0.004058013	0.005632177	0.00430343	0.003687814	0.004313221
AAAC	0.004358069	0.004114045	0.002592317	0.00530443	0.004332985	0.004763666	0.005154022	0.005285593	0.003054812	0.003830729	0.004279067
TCGT	0.00515624	0.004441897	0.004645576	0.004132313	0.004219435	0.003732803	0.004110361	0.004195088	0.00380455	0.003956767	0.004239503
TCGG	0.004495859	0.00430372	0.003964776	0.004308498	0.004105464	0.004244284	0.005285668	0.003312804	0.004436247	0.003798692	0.004225601
CGA	0.004451816	0.004573872	0.003373736	0.004967941	0.004526418	0.004037687	0.004766105	0.003811071	0.003970362	0.003479496	0.00419585
TCG	0.003733152	0.005076043	0.005857203	0.004430444	0.004065155	0.004177511	0.003880872	0.00291392	0.003199906	0.004400468	0.004173467
TCTG	0.004131551	0.00371998	0.004591197	0.003854602	0.003725281	0.003693465	0.003956227	0.004450042	0.003626192	0.005846582	0.004159512
ACAG	0.004571521	0.004640836	0.003511194	0.004428489	0.005061658	0.004280816	0.003363221	0.00276588	0.004218224	0.004429359	0.00412712
AAAA	0.00400339	0.004721395	0.002503092	0.00309432	0.003536841	0.003914254	0.004607332	0.003694119	0.004037202	0.007137387	0.004124933
TAGT	0.004706506	0.004034635	0.003344218	0.004020295	0.003879995	0.004240206	0.004895422	0.004857037	0.003598885	0.003565675	0.004114287
GTAA	0.005760597	0.004721575	0.002635396	0.004353524	0.004125891	0.003658974	0.00320202	0.005082114	0.004205648	0.003354623	0.004110036
GTTC	0.005331131	0.003368966	0.004746038	0.004406424	0.00420138	0.003167493	0.003514024	0.004068624	0.004380397	0.003778052	0.004096253
AACG	0.004686443	0.003318094	0.003185875	0.004172714	0.00342392	0.004246124	0.003927893	0.004376013	0.003440871	0.005338242	0.004011619
CTAG	0.004552666	0.003626576	0.003807098	0.004407811	0.003598259	0.003931741	0.003728791	0.004164884	0.004355233	0.003851448	0.004002451
CAAC	0.005359394	0.003729272	0.003985363	0.002967712	0.003775054	0.003884683	0.003551614	0.005186829	0.003873299	0.003567826	0.003988105
AGTG	0.003699892	0.004088331	0.005472421	0.003082368	0.00403579	0.003682771	0.003217999	0.004875993	0.003971385	0.003678825	0.003980578
GTGT	0.003711855	0.003996933	0.006160794	0.003798975	0.003346874	0.00317372	0.003890908	0.004105724	0.003777892	0.003058671	0.003902235
ATAC	0.003844159	0.003479778	0.002712165	0.003852796	0.003680995	0.003411963	0.005420769	0.003938641	0.003494488	0.004969714	0.003880547
AACC	0.004454513	0.003157468	0.003016249	0.003162818	0.004371581	0.003358427	0.00401061	0.005406135	0.003411355	0.004299487	0.003864864
ACAT	0.003481829	0.005007835	0.003544297	0.00321968	0.004011632	0.003963936	0.004158945	0.00359341	0.003401229	0.004086467	0.003846926
TACG	0.003649227	0.004097373	0.003236252	0.003740122	0.003404232	0.004548484	0.00393911	0.004354526	0.00379395	0.003657713	0.003842099
GTAT	0.003083966	0.003891429	0.005453773	0.004965392	0.002905605	0.004139613	0.003417894	0.001888509	0.004046206	0.00448745	0.003827984
TTAA	0.003469089	0.003363931	0.003139293	0.003822695	0.003238618	0.004822193	0.004188195	0.003715895	0.003575965	0.004832982	0.003816886
CGAT	0.004228987	0.003669391	0.003510334	0.00313218	0.003745386	0.003610673	0.003320069	0.004326431	0.003380064	0.004732845	0.003765636
CCTA	0.003810951	0.003616108	0.00410178	0.003271979	0.00329993	0.004568199	0.00368691	0.0029685	0.004102818	0.004208142	0.003763531
TTGG	0.00393676	0.003702344	0.003373757	0.004151471	0.003417991	0.003846873	0.003250756	0.003828471	0.004071686	0.003928258	0.003750837
TTCC	0.003492622	0.003484382	0.003718139	0.003080583	0.003712915	0.003112494	0.004194746	0.006342457	0.00329239	0.003056064	0.003748679
TAAC	0.002846079	0.004052397	0.003277863	0.003395371	0.004492212	0.003559246	0.003944925	0.004435157	0.003563082	0.003787052	0.003735338
GTAG	0.003966079	0.003944094	0.003148198	0.003055964	0.003416331	0.004386174	0.00432448	0.003932648	0.003572163	0.003596544	0.003734268
TGCG	0.004055369	0.002921255	0.006583351	0.003313339	0.003926702	0.003756907	0.003105563	0.002915485	0.003456096	0.003303552	0.003733762
GTTT	0.003815236	0.004169799	0.003400847	0.004445717	0.003291029	0.00322986	0.003895611	0.003649099	0.003447958	0.003952733	0.003729789
GGCT	0.003775713	0.003045322	0.002323554	0.003971853	0.003644489	0.004946963	0.004136436	0.003769758	0.003996205	0.003669467	0.003727976
ATAT	0.002855905	0.004813443	0.00391279	0.003788603	0.002911761	0.004399549	0.004101811	0.002305392	0.003744873	0.004355511	0.003718964
GACA	0.003855976	0.00361509	0.003220439	0.002912752	0.003726098	0.004149491	0.005047865	0.002916759	0.003548896	0.004165937	0.00371593
TCGC	0.003859182	0.004012895	0.002117436	0.003026735	0.004233197	0.004374157	0.004111653	0.004369135	0.003694117	0.002969971	0.003676848
AACA	0.003037991	0.003910529	0.00583841	0.00329379	0.003901877	0.00454494	0.003390886	0.002090296	0.004056346	0.002400075	0.003646514
ATTC	0.004085843	0.003665795	0.003484022	0.003293169	0.003431044	0.003708724	0.002531934	0.00428472	0.003521188	0.004343471	0.003634991
TCCG	0.003179793	0.004400524	0.003821155	0.004348952	0.00283407	0.003389076	0.003763791	0.003021482	0.004267107	0.00326476	0.003629071
CGAG	0.003098924	0.003296158	0.004734575	0.00403655	0.003804673	0.003194901	0.003871497	0.003157476	0.003808923	0.003265494	0.003626917
GGGA	0.004053082	0.004542262	0.00249689	0.00379851	0.003994328	0.003707263	0.003677176	0.002973658	0.003577142	0.003431959	0.003625227
CGAA	0.003475827	0.004029929	0.00315858	0.003367138	0.003761806	0.003497553	0.003544035	0.003276412	0.00358419	0.004319593	0.003601506
ATCC	0.003693818	0.003468896	0.004486413	0.003445194	0.00296799	0.004562006	0.003078509	0.003951742	0.003254307	0.003041818	0.003595069
CACT	0.003575107	0.00407811	0.00393387	0.003904879	0.003004083	0.002992173	0.002541543	0.00338783	0.003852082	0.004443142	0.003571282
CAGG	0.003554867	0.003669195	0.002061711	0.003989265	0.004588361	0.003828296	0.003471017	0.002346792	0.00444321	0.003248974	0.003520169
GTGA	0.003883029	0.004649168	0.003367111	0.003668521	0.003435488	0.002574858	0.002969054	0.00350491	0.00369969	0.003449266	0.003520109
TTGT	0.003793209	0.003564031	0.002469325	0.005166803	0.002991752	0.003721271	0.003269339	0.003250763	0.003189946	0.003724166	0.00351406
TTTA	0.00270962	0.004511938	0.00208641	0.003621219	0.003334057	0.003992091	0.003771415	0.003021883	0.002538195	0.005397909	0.003498474
GCG	0.004047578	0.003770294	0.001959482	0.003626502	0.003570107	0.004296609	0.003464137	0.002628982	0.003968101	0.003580766	0.003491256
GCAA	0.002550744	0.003172958	0.00390116	0.003028519	0.002850804	0.002764045	0.004672301	0.006081669	0.003187727	0.00265143	0.003486136
CCT	0.003206342	0.003544423	0.002835287	0.003674327	0.003045499	0.004019373	0.004233732	0.003152395	0.0036079	0.003203763	0.003452304
ACGA	0.004174219	0.003845073	0.002853018	0.00276588	0.003666649	0.00357873	0.003396263	0.002954363	0.004155663	0.00309794	0.00344878
GCCT	0.003433909	0.004271104	0.002225783	0.003840212	0.002620698	0.004238668	0.003493665	0.004554887	0.004152996	0.001230092	0.003406201
AGAC	0.003670546	0.002522445	0.002900775	0.003238358	0.003632227	0.003851452	0.002953999	0.004131473	0.003648381	0.003355492	0.003390515
GCA	0.003647609	0.002706164	0.002696829	0.003514139	0.003385605	0.003329485	0.003846617	0.004474095	0.00325174	0.002915617	0.00337679
CAGA	0.002852587	0.002660744	0.002557738	0.004010667	0.003726567	0.003705969	0.003366144	0.004801105	0.003236601	0.002815966	0.003373409
CTAC	0.003868697	0.003606844	0.004939008	0.003528723	0.003819073	0.002435972	0.003061259	0.002289706	0.00340776	0.002758542	0.003371558
CATC	0.002958869	0.002780265	0.002552071	0.003352506	0.003178846	0.002548657	0.003145696	0.00574992	0.003264958	0.004071127	0.003360292
GGG	0.003102221	0.004201708	0.002050672	0.003882531	0.003132901	0.003858705	0.002701169	0.002560875	0.003099175	0.004998452	0.003358841
CGGT	0.003701711	0.003077007	0.003517196	0.003330029	0.003692996	0.003866085	0.003254392	0.002313643	0.003685102	0.002971291	0.003340945
CTA	0.002604327	0.002958906	0.006487259	0.002987606	0.002816489	0.00283846	0.002615789	0.003501893	0.003243609	0.003171358	0.00332257
CGCA	0.00220407	0.003469569	0.004131315	0.002876401	0.003527565	0.003465954	0.003268703	0.004019414	0.002822969	0.003353134	0.003313909
GGGC	0.003668764	0.003946936	0.003144356	0.004209236	0.002953337	0.003314341	0.003443974	0.002344551	0.003322527	0.002679132	0.003302715
GGTG	0.002709233	0.003202095	0.002579884	0.003325005	0.003871615	0.004482022	0.003026423	0.003533282	0.003506573	0.002740681	0.003297681
GAGT	0.002455668	0.003719044	0.002155859	0.003567619	0.003843817	0.003389939	0.002930576	0.004789727	0.003142094	0.002926754	0.00329211
CTTA	0.003167558	0.003027587	0.004683814	0.003016031	0.002959943	0.003256639	0.00258087	0.003851614	0.003577956	0.002701968	0.003282398
GCTG	0.002946743	0.004161072	0.001320083	0.003525422	0.003534613	0.002912846	0.003077179	0.003369774	0.003313776	0.004434212	0.003259572
GTCG	0.00381494	0.003876709	0.002720892	0.003420435	0.003355676	0.003386402	0.003211986	0.002767187	0.003484174	0.002495661	0.003253406
TATT	0.00301285	0.003123681	0.001407356	0.003843108	0.00317954	0.003353752	0.004071131	0.003155002	0.00318811	0.004172716	0.003250725
CTGC	0.00241473	0.00358021	0.004666862	0.002970815	0.003015937	0.003328734	0.002854449	0.002278722	0.002592346	0.004737651	0.003244046
ACAA	0.002897761	0.003138355	0.002790391	0.003791426	0.003001777	0.00357799	0.002980944	0.003375084	0.002996774	0.003809055	0.003235956
CAAA	0.002483349	0.002778035	0.003736369	0.002580293	0.00291586	0.002743716	0.003126878	0.004631179	0.003239108	0.003824924	0.003205971
ACCG	0.003089273	0.002567566	0.005672448	0.003216903	0.003243212	0.002340275	0.003706273	0.003187131	0.002716297	0.002202074	0.003194145
CAGT	0.003787418	0.002658362	0.003382633	0.002861685	0.003131209	0.003526224	0.00280615	0.003179583	0.003552295	0.0030364	0.003192196
CCG	0.002498727	0.002756656	0.004840619	0.002954684	0.003724669	0.00272803	0.002991613	0.003578486	0.003146094	0.002675135	0.003189471
TGTT	0.001642115	0.002670171	0.004269103	0.003846076	0.002814439	0.003225716	0.003374322	0.003795932	0.003090706	0.003162755	0.003189134
TGGT	0.00308773	0.002774984	0.003061555	0.003295786	0.003315542	0.002594731	0.003455471	0.00374039	0.003420124	0.003070068	0.003181638
ACGC	0.003672849	0.004119507	0.002002234	0.002838021	0.002924064	0.003280435	0.003637616	0.003371117	0.002828444	0.002736058	0.003141035
TGAC	0.003229187	0.002846755	0.00445065	0.002822209	0.002924922	0.002713901	0.003023558	0.00406775	0.002549246	0.002751493	0.003137967
GGTT	0.003229055	0.002096394	0.003417029	0.003201082	0.002672771	0.002773683	0.003461844	0.003339742	0.003062909	0.003964906	0.003121941
AAC	0.003701745	0.003831258	0.001352429	0.003024598	0.003003735	0.003146735	0.003091859	0.004811192	0.003017308	0.002091316	0.003107217
ACAC	0.003428009	0.003059588	0.00247452	0.002974236	0.003401111	0.003340749	0.002957903	0.003628706	0.002530592	0.003234136	0.003102955
TCTA	0.003032976	0.002854703	0.004318556	0.003383053	0.002981424	0.003022165	0.002822588	0.002353577	0.003153017	0.003044721	0.003096678
CGC	0.003122758	0.003053049	0.003914362	0.003231799	0.003404714	0.002752354	0.003270701	0.001044929	0.00328323	0.00380851	0.00308864
CTTG	0.003002684	0.003182396	0.001817892	0.003527432	0.002539267	0.002845598	0.002584698	0.00445623	0.002908093	0.003859408	0.00307237
CGGC	0.002547124	0.003216674	0.001704826	0.002936624	0.003337323	0.003255707	0.003642731	0.003193902	0.003281563	0.003576727	0.00306932
TGTA	0.003479795	0.00447687	0.001124633	0.003193733	0.003142917	0.003678618	0.00367653	0.001825688	0.003327779	0.002671361	0.003059792
AAA	0.003145961	0.003446263	0.003015106	0.003875006	0.002859354	0.003743865	0.00346079	0.003035496	0.002420276	0.001371007	0.003037312
TCAG	0.002909281	0.003026157	0.003111227	0.002682148	0.002829255	0.003025783	0.002841114	0.002442894	0.003318692	0.004088318	0.003027487
GGTC	0.003120164	0.003110389	0.002672917	0.003613939	0.004233752	0.002787332	0.002968773	0.002238848	0.00287465	0.00254557	0.003016633
TGGA	0.003598239	0.002975378	0.003964096	0.002865101	0.00251261	0.002992021	0.002126354	0.002866887	0.003032937	0.003181638	0.003011526
GACT	0.002645974	0.003437883	0.004028784	0.00259397	0.002715702	0.002671346	0.003116697	0.002379709	0.002721988	0.00377563	0.003008768
CCGG	0.001674187	0.003648367	0.002570899	0.002764297	0.003343894	0.002941117	0.003711589	0.003579204	0.003479872	0.002368347	0.003008177
ATGG	0.003107777	0.002714561	0.00278998	0.002788294	0.002989688	0.002764775	0.003111599	0.00273481	0.003085626	0.003920635	0.003000774
CTCG	0.002523514	0.002708107	0.002846236	0.002853088	0.00333299	0.003226493	0.003691041	0.003551891	0.002616248	0.002655836	0.003000544
TGTG	0.003196004	0.002859951	0.004454131	0.0022315	0.003089123	0.002567352	0.002746238	0.002240603	0.003450646	0.00316388	0.002999943
GGCA	0.003182451	0.003037314	0.00206894	0.002585431	0.00311873	0.002784463	0.003859872	0.002604013	0.00355277	0.003048863	0.002984285
TGT	0.002355428	0.003221291	0.004403839	0.002871524	0.002462569	0.003034239	0.002893282	0.002195333	0.003391203	0.002969403	0.002979811
GACG	0.003070955	0.002877919	0.002256945	0.003178148	0.002759097	0.003180858	0.003632415	0.002870246	0.003188146	0.00277141	0.002978614
TCAC	0.003327134	0.002370012	0.004801198	0.002790834	0.002956873	0.002690871	0.003234069	0.003555217	0.002498291	0.00154912	0.002977362
CCAC	0.003040262	0.002497814	0.004177906	0.003013782	0.00260129	0.002437391	0.002936751	0.004021964	0.00255742	0.002462033	0.002974661
ATTG	0.001972947	0.002851475	0.003048835	0.002957982	0.00325582	0.002699731	0.003557596	0.003054448	0.003102527	0.003178137	0.00296795
TATC	0.0025169	0.003031061	0.001612804	0.00277104	0.004000255	0.00317164	0.003308322	0.002832402	0.003241582	0.003100564	0.002958657
AGCT	0.002435263	0.002653901	0.00339479	0.002486054	0.003051029	0.002468639	0.003370334	0.00286959	0.002841914	0.003892947	0.002946446
GAAG	0.003121091	0.00309381	0.002554543	0.003301972	0.002867263	0.003098514	0.002969491	0.003340955	0.002571925	0.002469745	0.002938931
TGCT	0.003839438	0.003660848	0.002682407	0.002258424	0.003801083	0.002980417	0.002237321	0.001828535	0.003128797	0.002817966	0.002923524
CGGA	0.003349962	0.002469339	0.003263047	0.003681852	0.002694045	0.002994531	0.002467664	0.002496572	0.003546659	0.002128391	0.002909206
TTAT	0.002899908	0.002379797	0.002768221	0.002894662	0.003100211	0.003663128	0.002375414	0.003644484	0.003189804	0.002103162	0.002901879
CGG	0.002168895	0.003138314	0.002592782	0.003599881	0.002988337	0.002628063	0.003878717	0.001795376	0.002918725	0.003043541	0.002875263
AGGT	0.00314863	0.003729292	0.002834371	0.00321715	0.003351934	0.002384657	0.002627463	0.00257386	0.003133223	0.001731214	0.002873179
TCGA	0.002915864	0.0028606	0.003030389	0.002643509	0.003219769	0.00229632	0.003144055	0.003135574	0.003199013	0.002267871	0.002871296
CCTT	0.002811517	0.002311568	0.003128651	0.002392474	0.002805795	0.002896727	0.003147018	0.0025397	0.003349387	0.003128366	0.00285112
TCT	0.002895488	0.003042686	0.002043659	0.002828895	0.002672422	0.002800071	0.002920813	0.00325739	0.002196277	0.003714539	0.002837224
TACA	0.003051664	0.002970675	0.004045491	0.003324903	0.003049545	0.002429813	0.003051517	0.001302298	0.003201459	0.001901695	0.002832906
TAT	0.002065475	0.003317861	0.003196452	0.002792339	0.002823019	0.002839349	0.00275881	0.003577916	0.002629468	0.002308132	0.002830882
ACG	0.0026892	0.002857931	0.003514567	0.002808039	0.003295799	0.002011857	0.00311826	0.002021032	0.002849643	0.003114594	0.002828092
CGCC	0.002852374	0.003340964	0.002078573	0.002994604	0.002243389	0.002757733	0.002573899	0.002931484	0.002843292	0.003641666	0.002825798
AGG	0.003027385	0.00386879	0.000474535	0.003656872	0.003251273	0.004478048	0.003445218	0.000833558	0.003367221	0.001805664	0.002820856
TTAC	0.00236276	0.00312864	0.004700583	0.00364308	0.002920645	0.002964825	0.002577223	0.001115767	0.002465339	0.002325594	0.002820446
TATG	0.003097128	0.003197693	0.002617805	0.003172296	0.002718979	0.002597554	0.002721871	0.003003096	0.003175126	0.001804357	0.00281059
TACC	0.003083699	0.002715687	0.003511858	0.00279728	0.002964558	0.002667404	0.002919665	0.001743157	0.003196652	0.002443357	0.002804332
GTTA	0.001892549	0.003304188	0.004523508	0.002864387	0.002875664	0.002422279	0.002797758	0.002602572	0.002665016	0.001994317	0.002794224
AAG	0.003038151	0.002346638	0.004204508	0.002552789	0.002684734	0.00251848	0.002813923	0.002496968	0.002850364	0.002348997	0.002785555
AGGG	0.002848072	0.002720418	0.002693759	0.003082697	0.002891924	0.002491572	0.003696043	0.003091532	0.003082804	0.001163727	0.002776255
AGAG	0.002315559	0.002698201	0.002918341	0.002329499	0.002800303	0.002485244	0.002516516	0.003651848	0.002414156	0.003400293	0.002752996
CCAT	0.002878512	0.003075651	0.001295277	0.002916827	0.003391936	0.002746993	0.002796651	0.002596358	0.003097665	0.002568475	0.002736434
GCCG	0.002355964	0.002657026	0.002126368	0.003487116	0.002883461	0.003015029	0.002987014	0.001926344	0.002864106	0.003038497	0.002734092
CCAA	0.002177404	0.003013567	0.003664774	0.00285002	0.002762951	0.002641844	0.002652922	0.002649026	0.002760106	0.002150238	0.002732285
AAAG	0.002742932	0.003224815	0.00138575	0.003436526	0.002528503	0.003246278	0.003004163	0.002073774	0.003226338	0.002225673	0.002709475
CGGG	0.002428187	0.00288264	0.002278172	0.002387623	0.003253433	0.002690902	0.002746588	0.00278902	0.002404026	0.00315846	0.002701905
TTGA	0.002369165	0.002664103	0.003026575	0.002663292	0.002948471	0.002192089	0.003103134	0.002063488	0.002523104	0.003334505	0.002688792
CCCG	0.002568453	0.002300354	0.002838466	0.002375297	0.002755986	0.002737597	0.002577578	0.002999288	0.002322653	0.00336017	0.002683584
TAGG	0.002052198	0.00232147	0.004939551	0.002548762	0.002664393	0.002477693	0.002620246	0.002496074	0.002948053	0.001609988	0.002667843
GTAC	0.002953688	0.002633593	0.002601504	0.002774506	0.003124917	0.002861307	0.002563931	0.002039308	0.003010784	0.002090138	0.002665368
CAA	0.001981174	0.002185095	0.004386609	0.001975661	0.002827499	0.002973149	0.002376271	0.00250177	0.001997245	0.003330133	0.002653461
GCAT	0.002475879	0.002509811	0.001622512	0.002485333	0.001893946	0.002555051	0.003073231	0.002571127	0.003651814	0.003510025	0.002634873
ACGG	0.001937752	0.00234128	0.002323007	0.003043174	0.003268494	0.002719875	0.002711083	0.002410932	0.002818311	0.002747441	0.002632135
GCTA	0.002523722	0.002516876	0.003109166	0.002648879	0.002972735	0.003210466	0.00269608	0.001954322	0.002658604	0.001997747	0.00262886
GAAC	0.002753412	0.003016128	0.002067094	0.002721365	0.00341256	0.002350389	0.002900004	0.002186168	0.003169263	0.00150422	0.00260806
TCCA	0.002685758	0.002764493	0.001781599	0.002834006	0.002606298	0.002281638	0.002870352	0.002998609	0.003205821	0.001994958	0.002602353
GTA	0.002011503	0.003730963	0.002487428	0.002699808	0.002730117	0.003081673	0.002675395	0.002560256	0.002393311	0.001567884	0.002593834
AGTC	0.002750018	0.002461425	0.004174675	0.002337999	0.002850479	0.002265013	0.002495413	0.002179797	0.00271261	0.001529807	0.002575724
GGC	0.00216473	0.002344206	0.002715027	0.002305343	0.002197531	0.002688542	0.003017447	0.003708233	0.002669345	0.001885891	0.002569629
TTCT	0.002186136	0.002323386	0.002454873	0.002688775	0.003116559	0.002300199	0.002409814	0.003219916	0.002380493	0.002557427	0.002563758
AGAA	0.002439531	0.002635047	0.002543868	0.002767289	0.002904828	0.003610171	0.001952886	0.00094778	0.002920077	0.002866671	0.002558815
GATC	0.003076376	0.002346063	0.00140704	0.00278214	0.002654411	0.002724468	0.002571374	0.00321345	0.002603934	0.002186355	0.002556561
TTTG	0.002490126	0.001698822	0.002915038	0.002861516	0.003207852	0.002590175	0.002409273	0.002796367	0.002254604	0.002266696	0.002549047
GGAG	0.00279148	0.002453433	0.002178418	0.003129492	0.002443757	0.002538184	0.002305787	0.003005795	0.002946324	0.001667984	0.002546065
GTGC	0.003299863	0.002518303	0.0032951	0.002438579	0.002722681	0.002237742	0.002505027	0.001726353	0.003004365	0.001667372	0.002541538
CCCC	0.002232097	0.002026621	0.001604964	0.002986001	0.002525871	0.002500347	0.002514655	0.003238327	0.003237256	0.002391671	0.002525781
GGTA	0.002292605	0.002224403	0.005171092	0.002030473	0.002260715	0.001919347	0.002549707	0.00211686	0.00210901	0.002472124	0.002514634
GCAG	0.001929629	0.002375403	0.002586801	0.002158238	0.002728786	0.002393147	0.002307917	0.002935584	0.002105712	0.003619227	0.002514044
AGAT	0.002311987	0.002553664	0.003731799	0.002772841	0.002886838	0.002803348	0.002253133	0.002504507	0.002434262	0.000856422	0.00251088
GGA	0.002202579	0.002400689	0.003005432	0.002334846	0.002330318	0.003021916	0.002566028	0.001785307	0.002381222	0.003040906	0.002506924
ACTA	0.003395645	0.00195679	0.002493795	0.002742581	0.002762648	0.002522819	0.002363138	0.002396431	0.002727801	0.001658967	0.002502062
GAAT	0.003109126	0.002585015	0.002979706	0.002580117	0.002681677	0.002268122	0.002119589	0.002711843	0.002767387	0.001181241	0.002498382
CAC	0.002286655	0.003141042	0.001674063	0.003291138	0.002866442	0.002285458	0.002151523	0.00237155	0.002694661	0.002193861	0.002495639
GACC	0.00255678	0.002067364	0.002494112	0.002829226	0.002704271	0.002665994	0.002790719	0.00189027	0.002816198	0.002106882	0.002492182
GTCT	0.001986814	0.00195387	0.003159565	0.002347829	0.002616023	0.002315162	0.00285976	0.003033062	0.002742607	0.001821492	0.002483618
GTGG	0.001912995	0.002418885	0.002933266	0.002358166	0.002685337	0.00194797	0.002035297	0.002525739	0.003150552	0.002765665	0.002473387
GTT	0.002157885	0.002520997	0.002315833	0.002836111	0.0032719	0.002070307	0.002517886	0.002095025	0.002892164	0.002039177	0.002471729
CACC	0.003053523	0.002249769	0.001826594	0.002471697	0.002685654	0.002245598	0.002083876	0.002701888	0.002792502	0.002596501	0.00247076
AATT	0.001589108	0.00290257	0.001061872	0.00267311	0.002616259	0.002911397	0.003005708	0.00303718	0.002400928	0.002498405	0.002469654
TAAA	0.002074356	0.002565067	0.003317664	0.002991714	0.00276714	0.002259806	0.002875376	0.001793587	0.002564998	0.001275305	0.002448501
TCCT	0.002332452	0.002264145	0.002681667	0.002598286	0.002919696	0.002233895	0.002053415	0.001639059	0.002933697	0.002679175	0.002433549
CTAT	0.002563785	0.00213985	0.002198446	0.002911797	0.002625706	0.002629217	0.002607869	0.001266105	0.002932575	0.002428505	0.002430386
ATAG	0.002154334	0.002256057	0.0018796	0.002182943	0.002363234	0.002724595	0.002097943	0.002753006	0.002585886	0.003266974	0.002426457
CATA	0.002136915	0.00225381	0.005173295	0.001878999	0.0024065	0.002546909	0.001830702	0.001613105	0.00209347	0.00231134	0.002424504
CGCT	0.001867999	0.001895802	0.004664234	0.001975227	0.002170798	0.00166997	0.002116308	0.002466432	0.002158712	0.003255425	0.002424091
TGTC	0.002006497	0.001720087	0.001903191	0.002818162	0.002186221	0.001497776	0.002734658	0.002913216	0.002550073	0.003786933	0.002411681
AGTT	0.002196368	0.002866069	0.00326181	0.002405637	0.001975551	0.002495671	0.002261722	0.002172586	0.002465875	0.002007321	0.002410861
ACTT	0.002543369	0.002603002	0.00314124	0.001805385	0.002636496	0.002746869	0.00207899	0.001949193	0.002683435	0.001904092	0.002409207
GGAA	0.002757416	0.002448226	0.002390132	0.00222175	0.003043989	0.002142686	0.002338583	0.002684262	0.002841212	0.001167373	0.002403563
TTAG	0.001869882	0.002630277	0.004115241	0.002459575	0.002933859	0.002567617	0.001494272	0.001615624	0.003055226	0.001276302	0.002401787
GCTT	0.002119246	0.002778936	0.002373205	0.001796377	0.002947866	0.002394691	0.002197494	0.001841913	0.002221034	0.003014847	0.002368561
TAC	0.002328334	0.002404601	0.004375539	0.002082904	0.002166576	0.002190173	0.002254863	0.001525811	0.002387513	0.00192897	0.002364528
CAAG	0.002215319	0.002257313	0.003260727	0.00173517	0.002376416	0.002265013	0.002276509	0.002843123	0.002795556	0.001558771	0.002358392
CTCT	0.001940413	0.002015372	0.003347271	0.002158784	0.002408487	0.001998093	0.002188238	0.003784537	0.002091384	0.001650205	0.002358278
TTA	0.002185359	0.002670309	0.003078505	0.002008247	0.002641453	0.001868102	0.002330297	0.001823379	0.002045828	0.002887128	0.002353861
CTTT	0.002073021	0.002573513	0.001869239	0.003078853	0.002728613	0.002305917	0.002566558	0.001612511	0.002166998	0.002554463	0.002352969
ACTC	0.002145934	0.002505607	0.003428867	0.002564326	0.002170744	0.002004475	0.002235303	0.002363375	0.002110796	0.001880219	0.002340965
GTC	0.001790698	0.002553364	0.002307901	0.002343694	0.002699752	0.002052526	0.002465563	0.001974518	0.002524035	0.002646	0.002335805
AGGA	0.002377423	0.001857221	0.003771104	0.002333984	0.002400103	0.002524735	0.00222019	0.001481115	0.002217055	0.002141109	0.002332404
CCGC	0.002477105	0.002187905	0.001669516	0.002407561	0.002867474	0.002664106	0.002649945	0.001754889	0.002515117	0.00210354	0.002329716
TCAT	0.001852637	0.002146608	0.003701314	0.001833258	0.002190112	0.002050221	0.002546733	0.002857628	0.00240359	0.001673352	0.002325545
TCTT	0.002601593	0.002381197	0.001390882	0.002409828	0.002701	0.002856634	0.002138542	0.001617674	0.002794691	0.002318602	0.002321064
CATG	0.002207922	0.002425799	0.002647402	0.001987719	0.002225501	0.002027602	0.002864186	0.002702769	0.002482139	0.001634664	0.00232057
TTC	0.001917393	0.002233991	0.002700154	0.002350554	0.002387871	0.002256196	0.002118325	0.002075137	0.002123237	0.003010935	0.002317379
AAGA	0.002351631	0.002223629	0.001928893	0.002782363	0.002307765	0.002326535	0.002870587	0.002103086	0.002338407	0.001910878	0.002314378
TGC	0.002321651	0.002070526	0.002134834	0.001880286	0.002217736	0.002385783	0.001848608	0.003509782	0.002463438	0.002213785	0.002304643
GAAA	0.002008843	0.002216699	0.002142617	0.003126152	0.002283103	0.002349984	0.002182322	0.002636329	0.002327409	0.001767931	0.002304139
TCA	0.00239638	0.002267299	0.00154011	0.002278664	0.00247695	0.00238415	0.002182751	0.001785002	0.003362509	0.00226795	0.002294177
ATA	0.001764222	0.002869418	0.001901603	0.003323144	0.002636433	0.002439406	0.002737743	0.001519586	0.002488433	0.001242137	0.002292212
CCCT	0.002545335	0.002315356	0.001221737	0.002541216	0.002501982	0.003100423	0.00149701	0.002935194	0.002341293	0.001907202	0.002290675
GATA	0.002548773	0.002214418	0.001239484	0.002325097	0.003018294	0.002483838	0.002568815	0.002015999	0.002447095	0.002033008	0.002289482
GAGG	0.002331423	0.002564129	0.001257666	0.00203326	0.002838341	0.002405993	0.002249127	0.001785079	0.00298091	0.00243058	0.002287651
CTGA	0.002439914	0.002852854	0.001859121	0.0026314	0.002826553	0.001869337	0.002066821	0.002423244	0.002847024	0.001015393	0.002283166
CATT	0.00200068	0.002300191	0.003119774	0.001607275	0.002811806	0.002064061	0.001897489	0.002011393	0.002682501	0.002308886	0.002280406
GGAC	0.001830234	0.002645404	0.0023732	0.00188709	0.002302799	0.00248094	0.00265397	0.002197018	0.002585909	0.001805759	0.002276232
CCAG	0.001801421	0.001730772	0.002913996	0.002559613	0.002580745	0.002095648	0.002238133	0.002223498	0.002730901	0.001865925	0.002274065
ACTG	0.002213558	0.001701857	0.003515623	0.002077405	0.002852763	0.002175566	0.002576826	0.001317009	0.002638187	0.001486046	0.002255484
AAGC	0.00203907	0.002697787	0.002234358	0.002430166	0.002005538	0.002690611	0.001728552	0.002466517	0.002368298	0.001863662	0.002252456
TAGA	0.00240072	0.002050484	0.001903419	0.00231697	0.002291229	0.002526381	0.00230701	0.00219323	0.002509018	0.002005335	0.00225038
ATGA	0.001792057	0.002469121	0.003077154	0.001960503	0.002822663	0.002385726	0.001937313	0.000936134	0.002452832	0.002646519	0.002248002
TAAG	0.001980381	0.002136284	0.002756484	0.002117946	0.00232099	0.002033372	0.002081008	0.001645547	0.002152298	0.003203054	0.002242736
CACG	0.001300219	0.00263166	0.000931614	0.002669604	0.002610758	0.002477346	0.002810016	0.003704557	0.00244571	0.000770823	0.002235231
CCGA	0.00236147	0.002456286	0.002157463	0.001955023	0.002440406	0.001877694	0.001834093	0.002561577	0.00201994	0.002682691	0.002234664
TTCA	0.002105015	0.002280595	0.002231577	0.002244811	0.002617071	0.002421354	0.002143578	0.001196407	0.002524539	0.00230662	0.002207157
CCC	0.0018958	0.002325823	0.001665592	0.002268897	0.00247291	0.002016801	0.002313235	0.002030323	0.002260492	0.002650131	0.00219
ATGT	0.001552315	0.002138757	0.002977566	0.002026571	0.002478976	0.002219312	0.002067028	0.002349827	0.002003713	0.002049701	0.002186377
ACCC	0.002120284	0.002108612	0.003000951	0.001687578	0.00222988	0.001795076	0.001571869	0.002432399	0.002053467	0.00285196	0.002185208
ATGC	0.002393869	0.00187053	0.001970815	0.001924212	0.002552605	0.002363654	0.002301573	0.002367306	0.00245826	0.001567786	0.002177061
GAGA	0.002145455	0.001864333	0.002147878	0.002010157	0.002283774	0.002336304	0.001923785	0.00212597	0.002412667	0.002483452	0.002173377
TAA	0.001798373	0.001938427	0.002155355	0.002213239	0.001596682	0.002164523	0.002185413	0.002223722	0.003079204	0.002232473	0.002158741
GAC	0.001846425	0.001623634	0.002576566	0.0017831	0.002367532	0.001975644	0.002289237	0.002203004	0.002299885	0.002410955	0.002137598
AGTA	0.001716485	0.00216702	0.003237166	0.002157356	0.002503333	0.002020322	0.002094976	0.001618318	0.001988474	0.001864108	0.002136756
CAG	0.001885073	0.001856628	0.002164233	0.002165477	0.002432632	0.002798973	0.002009341	0.002151433	0.002119374	0.001771876	0.002135504
CAAT	0.002005696	0.001986672	0.001927443	0.001772736	0.002732763	0.002473683	0.002446377	0.001745744	0.002660018	0.001573658	0.002132479
CTCC	0.001882248	0.001887442	0.002979926	0.0021745	0.002430806	0.002562309	0.001726665	0.00153842	0.002544268	0.001573793	0.002130038
TTG	0.001353185	0.002150821	0.002748824	0.001797555	0.002173996	0.001661262	0.002296821	0.001831269	0.002489405	0.002787292	0.002129043
CAT	0.002148627	0.002166543	0.001623888	0.001811133	0.002330584	0.002402475	0.001970733	0.001834888	0.002518888	0.002466805	0.002127456
GATT	0.002110948	0.002104111	0.0020593	0.002402265	0.001657496	0.002119379	0.002281575	0.002528442	0.002583743	0.001316316	0.002116357
TAGC	0.001717304	0.002068259	0.00318247	0.00225725	0.002420968	0.002030649	0.002117152	0.002025303	0.002005061	0.001315188	0.00211396
CTGT	0.002097927	0.002256292	0.00238165	0.001318917	0.002415428	0.002462127	0.002106	0.002279228	0.001908062	0.00189792	0.002112355
ATTA	0.002248302	0.002203888	0.001057909	0.002374188	0.002114474	0.002719222	0.001901411	0.001917939	0.002298943	0.00226912	0.002110539
GTTG	0.002021159	0.002155686	0.002404839	0.001870321	0.002601132	0.001527201	0.00177289	0.002213928	0.002310388	0.002056926	0.002093447
CTTC	0.001449621	0.001420838	0.001714134	0.001867487	0.002537794	0.002422109	0.002631644	0.001625657	0.002246471	0.002917027	0.002083278
GCCC	0.001961173	0.001591227	0.003421576	0.00170509	0.002488025	0.00207107	0.001784335	0.001280933	0.002547514	0.001942451	0.00207934
AAGT	0.002067623	0.002899539	0.001842284	0.002423315	0.002798646	0.002297278	0.002014168	0.000894798	0.001882251	0.001635247	0.002075515
TGCA	0.001832177	0.001972882	0.002433441	0.001661554	0.002447599	0.001782369	0.002256034	0.00199572	0.002604369	0.001753143	0.002073929
GTCC	0.001703513	0.002315465	0.002224722	0.00208126	0.00236437	0.002330349	0.001679932	0.001898369	0.002310828	0.001642749	0.002055156
GGGG	0.001968305	0.002169642	0.001576317	0.001792141	0.002344143	0.002310435	0.00210322	0.002811374	0.001983568	0.001457598	0.002051674
GCAC	0.001477702	0.002112835	0.002326351	0.001800213	0.002217651	0.001969402	0.001731446	0.001956755	0.002273424	0.002582996	0.002044877
ATT	0.001789295	0.002398085	0.002097273	0.002224133	0.002066284	0.002708021	0.002116697	0.001286942	0.002442118	0.001213962	0.002034281
GATG	0.002017591	0.002173936	0.001780341	0.001730859	0.001695665	0.001783758	0.002394202	0.002683826	0.002147401	0.001925447	0.002033303
AGC	0.001992634	0.002067496	0.000852407	0.002048666	0.002627448	0.002421483	0.002314465	0.002809686	0.001857076	0.001281339	0.00202727
AATA	0.002119771	0.001967703	0.002021365	0.002403874	0.001865528	0.002458861	0.001678605	0.001695975	0.002023811	0.002024531	0.002026003
ATCA	0.002011091	0.001504749	0.00264399	0.001836967	0.001897571	0.002130606	0.001829137	0.001716906	0.001949885	0.002710573	0.002023148
TAG	0.001864256	0.002418661	0.000867486	0.001941764	0.002012398	0.002541257	0.002122732	0.001759741	0.002398087	0.002225528	0.002015191
TCAA	0.001690586	0.001554363	0.001989206	0.002320511	0.002350896	0.00185094	0.001951094	0.002234855	0.00240478	0.001793078	0.002014031
TCC	0.00146423	0.002387091	0.001227369	0.001716511	0.002284184	0.002455091	0.00160635	0.001415766	0.002375757	0.003161113	0.002009346
CCTC	0.00164933	0.001367302	0.004492125	0.001639139	0.001915229	0.00155426	0.002005277	0.001653998	0.002080993	0.001720571	0.002007822
AACT	0.001907512	0.002102975	0.001548788	0.001728698	0.002063589	0.001948739	0.001771924	0.002123237	0.002446205	0.002388006	0.002002967
ACT	0.001583885	0.001724401	0.002992842	0.00233227	0.001843676	0.002118557	0.001761887	0.001632219	0.001953749	0.002044459	0.001998794
GTG	0.001820222	0.002372735	0.001254299	0.001680333	0.002398639	0.002044584	0.002190927	0.001257421	0.002502762	0.002463971	0.001998589
GAA	0.001619647	0.001944791	0.002576888	0.001524278	0.002070647	0.002407537	0.00188813	0.001314316	0.001916381	0.002697698	0.001996031
GGCG	0.001486376	0.002110903	0.001942832	0.002018345	0.002360472	0.001629832	0.00230782	0.001246832	0.00219606	0.002655307	0.001995478
TGAA	0.001768149	0.002142343	0.002281875	0.00157623	0.001966377	0.002159282	0.001692255	0.00222707	0.002176367	0.001834575	0.001982452
AGA	0.002023341	0.002130945	0.001749215	0.002058186	0.001985442	0.002305892	0.001772118	0.001674653	0.002376658	0.001745878	0.001982233
TGAT	0.002004118	0.001893915	0.00191323	0.001916135	0.002075698	0.001916467	0.001999382	0.002111793	0.002110138	0.001737236	0.001967811
TGA	0.001897792	0.001822993	0.001663316	0.002253388	0.002221082	0.002027963	0.001851721	0.001421161	0.002548667	0.001923611	0.001963169
ATAA	0.001210069	0.00195944	0.001686423	0.002240379	0.001931583	0.002855214	0.002027795	0.001377847	0.001833237	0.002496561	0.001961855
CTC	0.001690847	0.002106506	0.002346934	0.001861144	0.001677671	0.001464729	0.001976973	0.002086297	0.001952228	0.002440085	0.001960341
ACCA	0.001545704	0.001887196	0.002990243	0.002132888	0.002048887	0.002122573	0.001777215	0.001297612	0.002050609	0.001600459	0.001945339
TGCC	0.001841907	0.002808135	0.002780291	0.001819149	0.001855962	0.002012546	0.001812778	0.000845187	0.002280203	0.0013956	0.001945176
CCA	0.001578523	0.002134594	0.001613531	0.001925282	0.002130232	0.002092595	0.001967943	0.001846599	0.002222829	0.001914048	0.001942618
TACT	0.00151982	0.001925526	0.001250233	0.002008902	0.001761905	0.002174308	0.00289174	0.000968973	0.002872732	0.001948272	0.001932241
TAAT	0.001467975	0.001122083	0.001033536	0.002008405	0.002594413	0.002356604	0.00209032	0.002475725	0.00213884	0.002008081	0.001929598
ATTT	0.000842936	0.001988548	0.002728174	0.001933352	0.001796143	0.002415521	0.001837665	0.001420926	0.00194451	0.002385767	0.001929354
AATC	0.001767488	0.001829992	0.002516944	0.001318738	0.002615089	0.00125218	0.001610685	0.002214029	0.001869538	0.002280853	0.001927554
GAGC	0.001759091	0.002167535	0.001706063	0.001923579	0.0025254	0.002092761	0.002047768	0.001661764	0.002267861	0.00111441	0.001926623
CCCA	0.001790213	0.001831438	0.002569405	0.001668248	0.001760484	0.001904723	0.001477643	0.001869888	0.002034051	0.002257932	0.001916403
ACC	0.001617046	0.001741912	0.002819446	0.00221998	0.001735238	0.001438664	0.001631323	0.001702311	0.002372478	0.001800686	0.001907908
ATC	0.001701891	0.001941658	0.001238781	0.002046055	0.00174109	0.00208588	0.001716849	0.00304685	0.002365419	0.001113957	0.001899843
TTTC	0.001607054	0.001559444	0.001776594	0.00174247	0.002688356	0.00165033	0.002037144	0.002139095	0.001873544	0.001920617	0.001899465
CAGC	0.001791795	0.002593452	0.000729517	0.002001332	0.001649115	0.001981034	0.002126765	0.001899801	0.002563114	0.001236534	0.001857246
GCC	0.001734172	0.001969722	0.002677197	0.001808749	0.001440651	0.001803713	0.00179885	0.001535872	0.002007266	0.001773605	0.00185498
GGCC	0.001540763	0.00204446	0.001633182	0.002051187	0.001860877	0.001670758	0.001644955	0.002140546	0.001885848	0.00198872	0.00184613
TTT	0.002128467	0.00250323	0.000639913	0.002228544	0.002200964	0.002047108	0.001923675	0.001072228	0.002144876	0.001529228	0.001841823
CGTG	0.001520426	0.001891428	0.002302016	0.002016359	0.002431696	0.001464165	0.001421888	0.001908099	0.002524174	0.000919922	0.001840017
TCCC	0.002146103	0.001905036	0.000844618	0.002360186	0.00223059	0.002006841	0.002120925	0.000923922	0.002166175	0.001614655	0.001831905
GAG	0.001564035	0.001918512	0.001917351	0.001767106	0.002343746	0.002006011	0.001819848	0.001436005	0.002189804	0.001343372	0.001830579
TCTC	0.001794997	0.001921768	0.001457715	0.00201188	0.001946999	0.001805837	0.002011874	0.001499341	0.001913296	0.001904587	0.001826829
GCTC	0.001469907	0.001938604	0.001382054	0.002121514	0.002126196	0.001683699	0.002004123	0.000778313	0.002362841	0.002333244	0.00182005
GCCA	0.001425398	0.001797085	0.001973212	0.001521374	0.001937439	0.001816548	0.001756006	0.00175431	0.002206626	0.001718916	0.001790691
AGCC	0.001752858	0.002007827	0.001912328	0.001629309	0.001839001	0.002385374	0.001434199	0.001482721	0.002080561	0.001174054	0.001769823
AATG	0.001555636	0.001914165	0.001539798	0.001665945	0.001932251	0.002040326	0.001777623	0.001140135	0.002610252	0.001503085	0.001767922
TTGC	0.001227963	0.002063551	0.001397571	0.001392895	0.002354146	0.002269166	0.001792508	0.001952106	0.002166823	0.0010033	0.001762003
CTAA	0.001721925	0.001717549	0.001488096	0.002601894	0.002076449	0.001886996	0.001856878	0.00078723	0.002046052	0.001398794	0.001758186
AGT	0.001707382	0.001656371	0.002885554	0.001857417	0.001740161	0.001467755	0.002220741	0.00149814	0.00148645	0.001008044	0.001752802
CTT	0.001379732	0.001503451	0.001615169	0.002134765	0.001813319	0.001791669	0.002008829	0.001383698	0.001946192	0.001411828	0.001698865
ATG	0.001588309	0.001693525	0.001124585	0.00235986	0.002317507	0.001233029	0.00219909	0.000682825	0.001569228	0.001598435	0.001636639
GAT	0.001103592	0.002148215	0.000886273	0.001898964	0.00183563	0.002046336	0.001929161	0.00096929	0.001878017	0.001521311	0.001621679
AAAT	0.002064884	0.001853612	0.000403377	0.002048472	0.001629695	0.002200373	0.001523579	0.001110808	0.001682317	0.001649013	0.001616613
AAT	0.001901486	0.002309403	0.000818044	0.002089896	0.001606391	0.0013426	0.001992978	0.001135768	0.001751216	0.000959551	0.001590733
